# Supplementary material for: Parents’ Views with Music Therapy in the Pediatric Intensive Care Unit: A Retrospective Cohort Study
Source: MDPI journal article supplement (doi:10.3390/children9070958), 2022-06-26
Supplement: s1 [file s1]

## **Supplementary material**

### **Questionnaire (parents)**

- Q1. Overall, music therapy was of benefit to my child.
- Q2. I felt that my child was respected and supported in music therapy.
- Q3. Music therapy helped my child feel less isolated.
- Q4. Music therapy helped my child to cope with being in hospital.
- Q5. Music therapy contributed to my child's physical recovery.
- Q6. Music therapy was of no help to my child.
- Q7. Music therapy helped my child feel less anxious.
- Q8. Sometimes music therapy was particularly unpleasant.
- Q9. Music therapy helped my child to communicate.
- Q10. Music therapy contributed to my child's psychological well-being.
- Q11. Music therapy contributed to ameliorate our relationship with the PICU team.
- Q12. Music therapy was explained to us adequately.
- Q13. Our cultural background and religion were acknowledged and respected.
- Q14. Music therapy should be pursued in the future.
- Q15. Music therapy should be offered as an out-patient service.
